# Supplementary material for: Gubernamentalidad, precarización y nueva servidumbre: agenciamientos a partir de los circuitos de producción mercantil de cuidados y subjetividades
Source: MDPI journal article supplement (doi:10.3390/biology11020332), 2009-01-01
Supplement: s1 [file s1]

Archive with 3 entries (3 files):
- biology-1537143 original figures.pdf
- biology-1537143-supplementary.pdf
- supplementary Figures.pdf
