# Supplementary material for: Gubernamentalidad, precarización y nueva servidumbre: agenciamientos a partir de los circuitos de producción mercantil de cuidados y subjetividades
Source: MDPI journal article supplement (doi:10.3390/biology11020332), 2009-01-01
Supplement: s1 [file s1]

Supplementary Figure S1

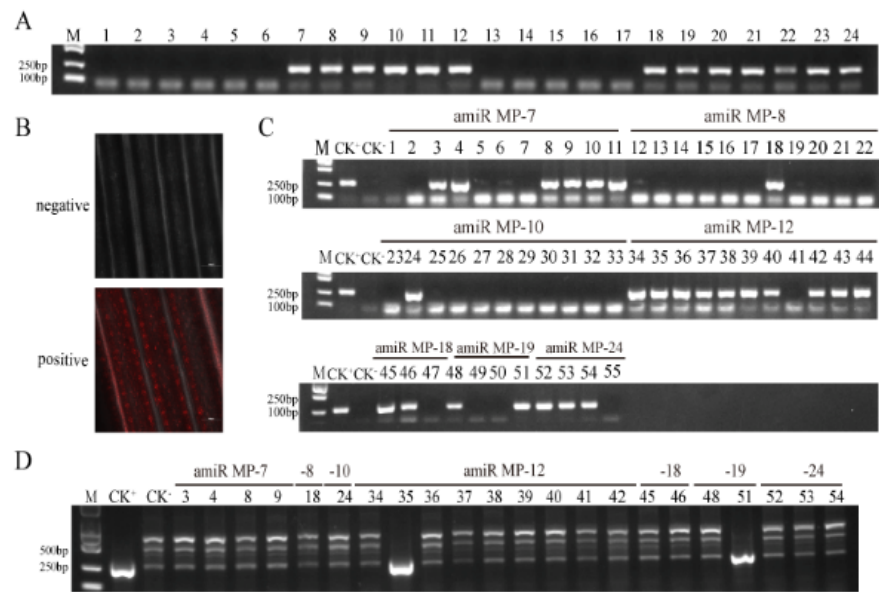

Figure S1 Selection of positive marker-free transgenic plants.

**A** PCR detection confirming successful transformation of amiR MP in *Oryza sativa* L. var. Zhegeng-88.

**B** Confocal microscope observation of red fluorescence (positive) or no red fluorescence (negative) in

leaves of T<sub>1</sub> transgenic plants. **C** PCR detection of amiR MP in the RFP-free transgenic plants. CK<sup>+</sup>, the

plasmid of 1300 pre-amiR MP was used as positive control for PCR, CK<sup>-</sup>, the DNA of Wild type

(Zhegeng-88) plants was used as the negative control. No bands were obtained from the wild type plants,

demonstrating the specificity of the primers. **D** PCR detection of marker gene RFP to confirm that the

positive amiR MP transformed plants were without the selective marker.
