# Supplementary material for: Gubernamentalidad, precarización y nueva servidumbre: agenciamientos a partir de los circuitos de producción mercantil de cuidados y subjetividades
Source: MDPI journal article supplement (doi:10.3390/biology11020332), 2009-01-01
Supplement: s1 [file s1 › biology-1537143-supplementary.pdf]

Table S1. Primers used for analysis.

| Primer name | Sequence (5'-3')                                           |
|-------------|------------------------------------------------------------|
| Primer-F1   | GGATCCCTGTAGCAGCAGCAGTTTCTGAACTACATTAGTCGTCAGGAGATACAGTTTG |
| Primer-R1   | GAGCTCGCCTAGCAGCAGGAATTTCTGAACTACATTAGTCGTCAGAGAGGCAAAAGTG |
| amiR MP     | TGCTGATTACATCAAGTCTTT                                      |
| 35S         | TCATTTCATTTGGAGAGAACACGGG                                  |
| NOS         | AGACCGGCAACAGGATTCAATC                                     |
| PCV-F1      | TAACTCGACGACAACAGTCGCAGTG                                  |
| PCV-F2      | TAGAGCAGCTTGAGCTTGGATCAG                                   |
| PCV-F3      | ATGAATCACTGGTTGATCGGTGGC                                   |
| PCV-F4      | CAAGAACCAAGGATAACTCGACGAC                                  |
| PCV-F5      | GGCATGGGAGTAGGGACTAAAGGT                                   |
| LAD2        | ACGATGGACTCCAGAGVNVNHHGGTA                                 |
| LAD3        | ACGATGGACTCCAGAGHNVNHNCCAC                                 |
| LAC1        | ACGATGGACTCCAGAG                                           |
| RT-MP-F     | AGCTCAGGGAAGCTCTTGCTGGT                                    |
| RT-MP-R     | CACTAGAGGATAAGGCTATAAACC                                   |
| RT-UBC-F    | TTTCGGTCCTGATGATACTCCC                                     |
| RT-UBC-R    | CACAGAGCAAAGACTGGATTGA                                     |
| RT-CP-F     | CACCGAGGACACTATCCCATAC                                     |
| RT-CP-R     | CAAAGATGCGTTGTCTTACCTG                                     |
| NB-MP-F1    | CAGAACTGTGTCATCTCCAGAACTC                                  |
| NB-MP-R1    | AGCTGGACAAATGGTTTATAGCCTT                                  |
| NB-MP-F2    | AAGCTGTTGGAGGTGCTTTCACT                                    |
| NB-MP-R2    | CTACATGATGACAGAACTTCAGAT                                   |

Table S2. Plant height of homozygous transgenic plants amiR MP-24.

| Transgenic line | Plant height (cm) (18 plants) |    |    |    |    |    | Average  | P value |
|-----------------|-------------------------------|----|----|----|----|----|----------|---------|
| amiR MP-24      | 84                            | 84 | 86 | 79 | 84 | 83 | 85.4±2.7 | 0.189   |
|                 | 80                            | 80 | 82 | 84 | 82 | 84 |          |         |
|                 | 89                            | 88 | 83 | 87 | 87 | 89 |          |         |
| WT              | 82                            | 83 | 88 | 87 | 89 | 84 | 84.2±3.0 |         |
|                 | 87                            | 87 | 85 | 84 | 80 | 84 |          |         |
|                 | 89                            | 89 | 88 | 86 | 83 | 83 |          |         |

Table S3. Tiller number of homozygous transgenic plants amiR MP-24.

| Transgenic line | Tiller number (18 plants) |   |    |   |   |   | Average | P value |
|-----------------|---------------------------|---|----|---|---|---|---------|---------|
| amiR MP-24      | 7                         | 6 | 5  | 6 | 5 | 7 | 7.1±1.6 | 0.649   |
|                 | 9                         | 6 | 6  | 9 | 6 | 9 |         |         |
|                 | 5                         | 7 | 10 | 8 | 8 | 9 |         |         |
| WT              | 7                         | 9 | 6  | 8 | 8 | 8 | 7.3±1.2 |         |
|                 | 8                         | 8 | 9  | 5 | 7 | 9 |         |         |
|                 | 7                         | 8 | 6  | 6 | 5 | 8 |         |         |

Table S4. seed-setting rate of homozygous transgenic plants amiR MP-24.

| Transgenic line | seed-setting rate (%) |       |       |       |       |       |       | Average    | P value |
|-----------------|-----------------------|-------|-------|-------|-------|-------|-------|------------|---------|
| amiR MP-24      | 93.87                 | 94.97 | 93.12 | 93.23 | 93.16 |       |       | 93.67±0.79 | 0.819   |
| WT              | 89.81                 | 90.16 | 95.60 | 96.26 | 96.93 | 94.39 | 94.71 | 93.9±2.86  |         |

Table S5 Grains per spike of homozygous transgenic plants amiR MP-24

| Transgenic line | Grains per spike (grains) |     |     |     |     |     |     |  | Average    | P value |
|-----------------|---------------------------|-----|-----|-----|-----|-----|-----|--|------------|---------|
| amiR MP-24      | 199                       | 189 | 203 | 179 | 177 |     |     |  | 189.4±11.6 | 0.378   |
| WT              | 141                       | 165 | 174 | 206 | 158 | 215 | 185 |  | 177.7±26.3 |         |
